# Supplementary material
Source: HighWire-hosted journal article supplement (https://jnm.snmjournals.org/highwire/filestream/94860/field_highwire_adjunct_files/0/162032_Supplemental_Data.pdf)
Supplement: 162032_Supplemental_Data.pdf [file 162032_Supplemental_Data.pdf]

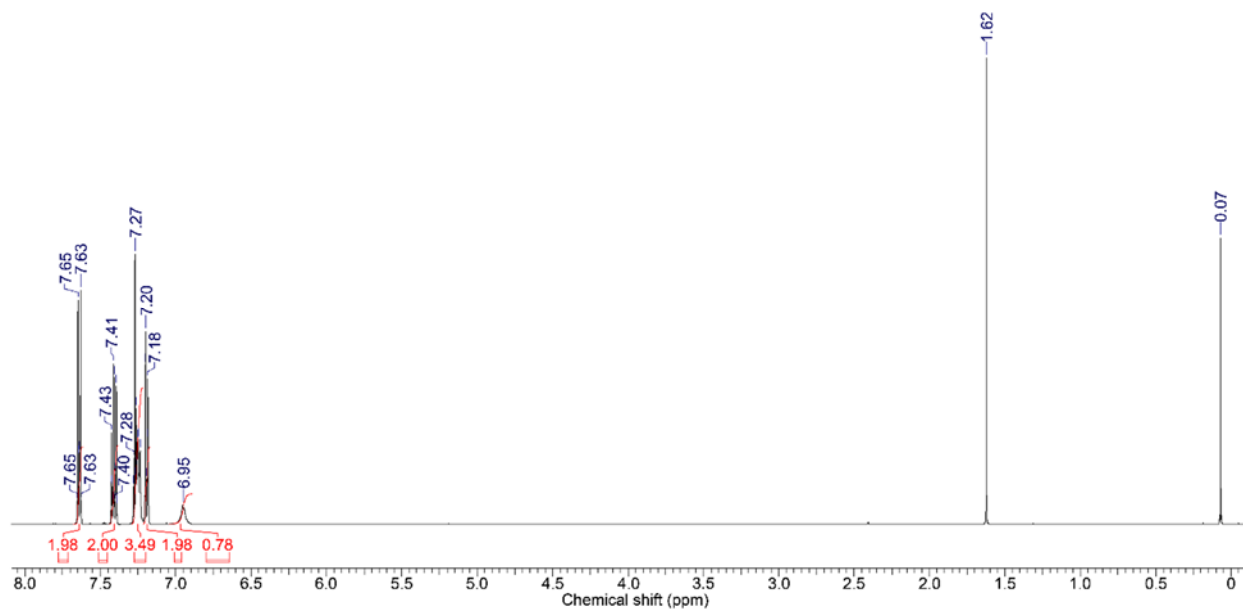

**SUPPLEMENTAL FIGURE 1.** <sup>1</sup>H-NMR of phenyl 4-iodophenylcarbamate (1, PIP) MP<sub>(toluene)</sub>: 159-161 °C. Data recorded on a Bruker AVANCE 500, operating at 500.1 MHz. Chemical shifts are reported in parts per million relative to Me<sub>4</sub>Si in CDCl<sub>3</sub>.

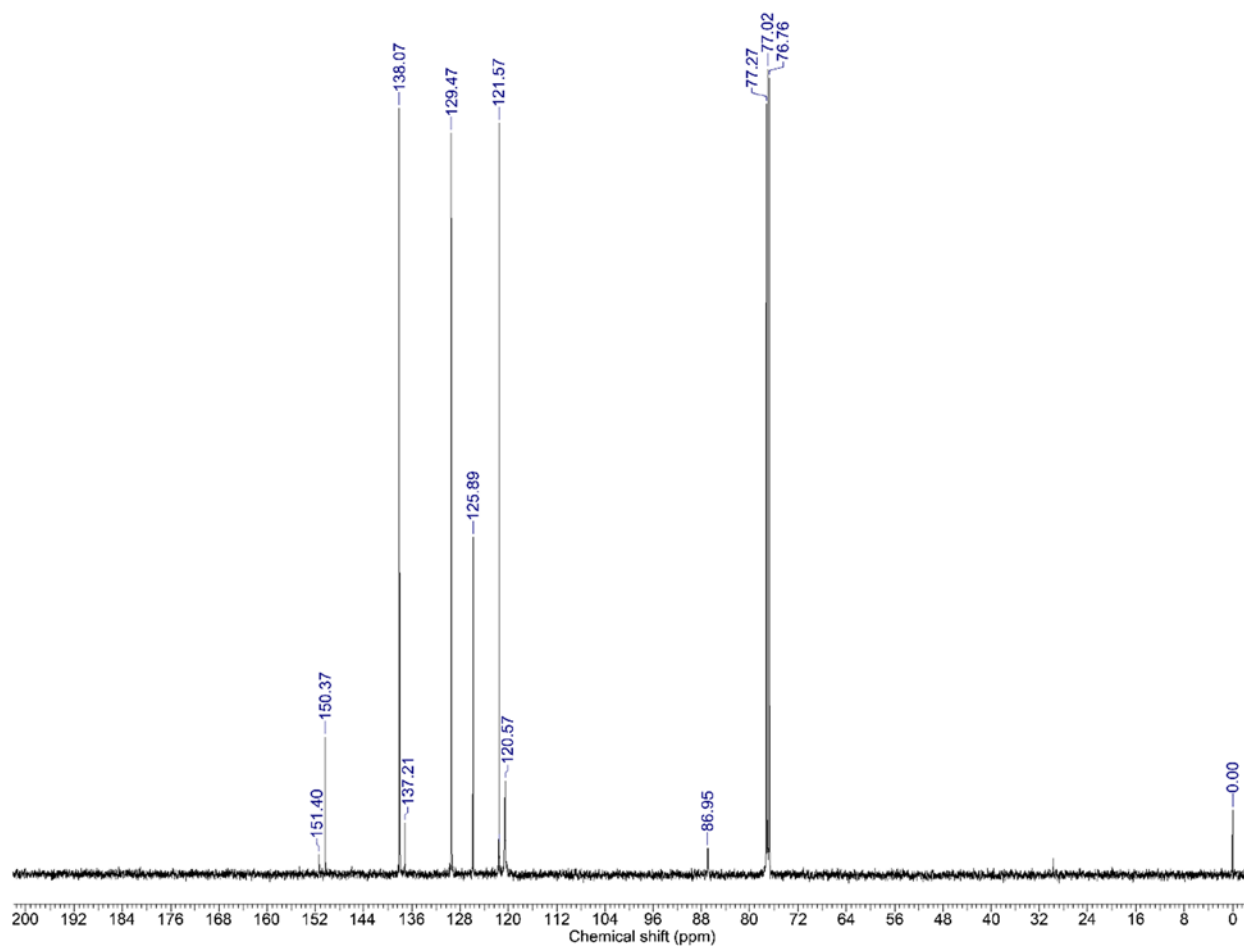

**SUPPLEMENTAL FIGURE 2.** <sup>13</sup>C-NMR of phenyl 4-iodophenylcarbamate (1, PIP). Data recorded on a Bruker AVANCE 500, operating at 125.8 MHz. Chemical shifts are reported in parts per million relative to CDCl<sub>3</sub>.

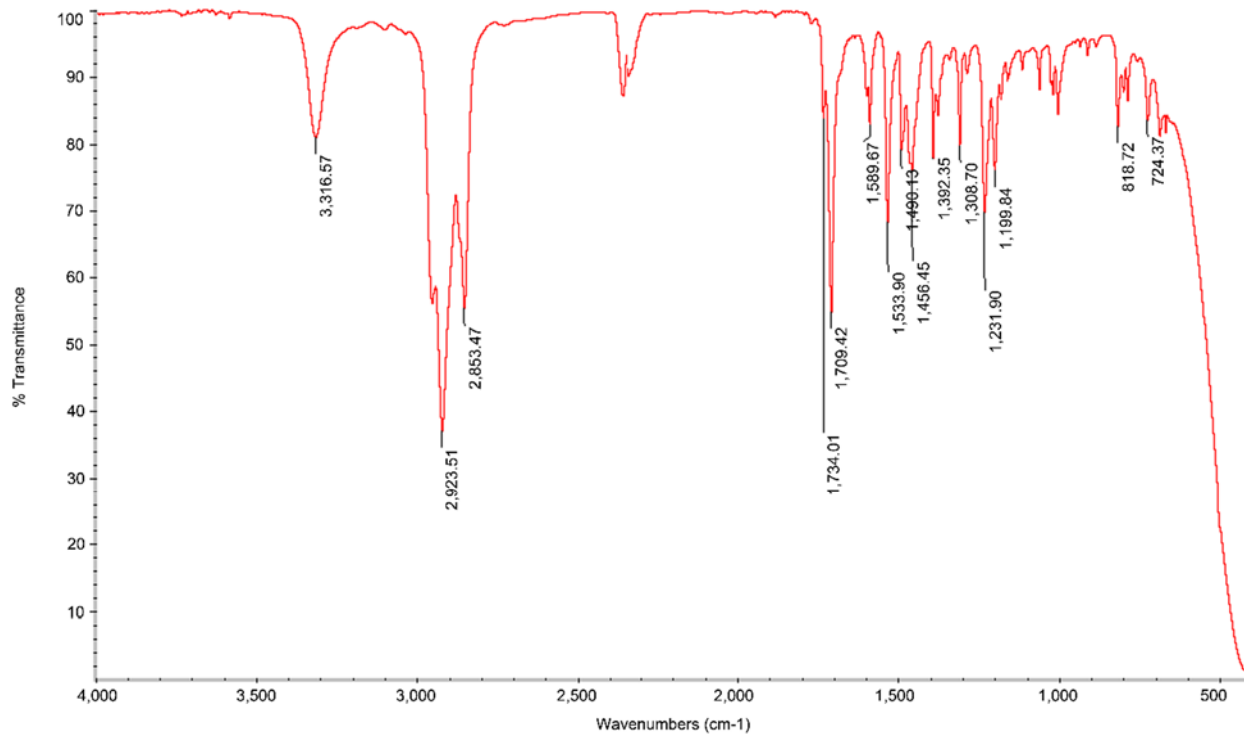

**SUPPLEMENTAL FIGURE 3.** IR spectrum of phenyl 4-iodophenylcarbamate (1, PIP). Infrared spectra were recorded as nujol mulls on a Nicolet Avatar 330 FT-IR spectrometer

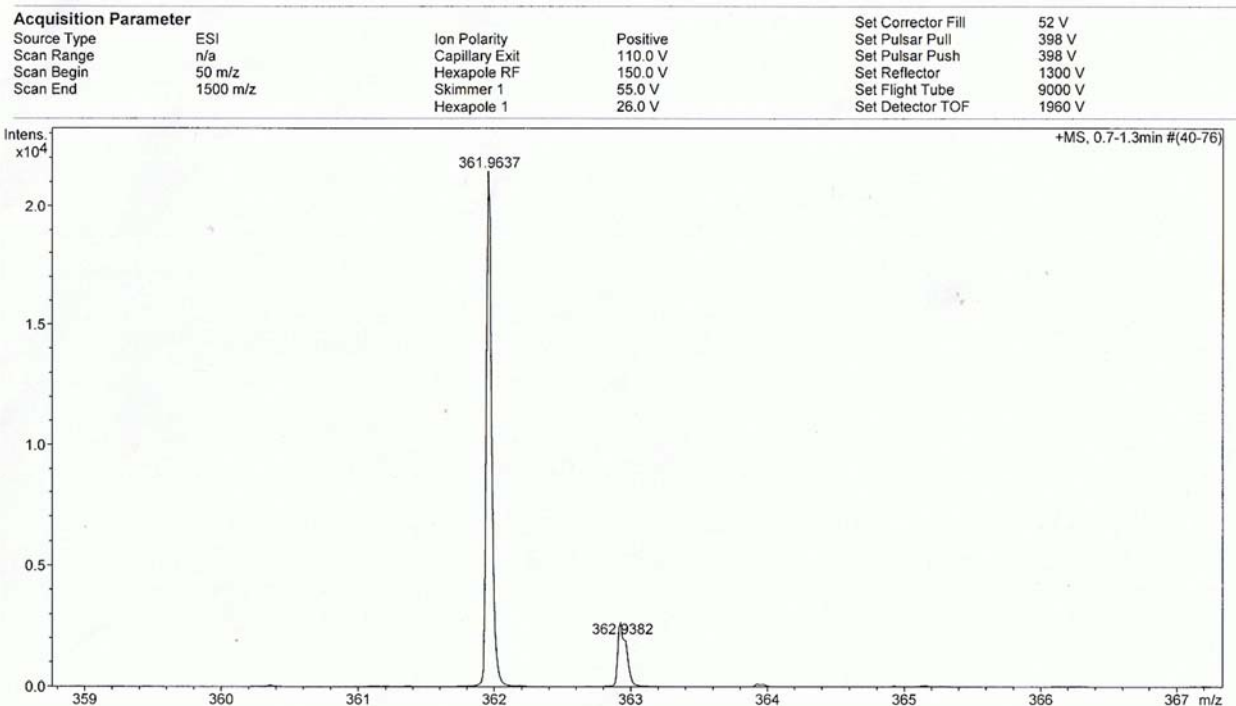

**SUPPLEMENTAL FIGURE 4.** HRMS of phenyl 4-iodophenylcarbamate (1, PIP).  $MH^+$  is indicated.

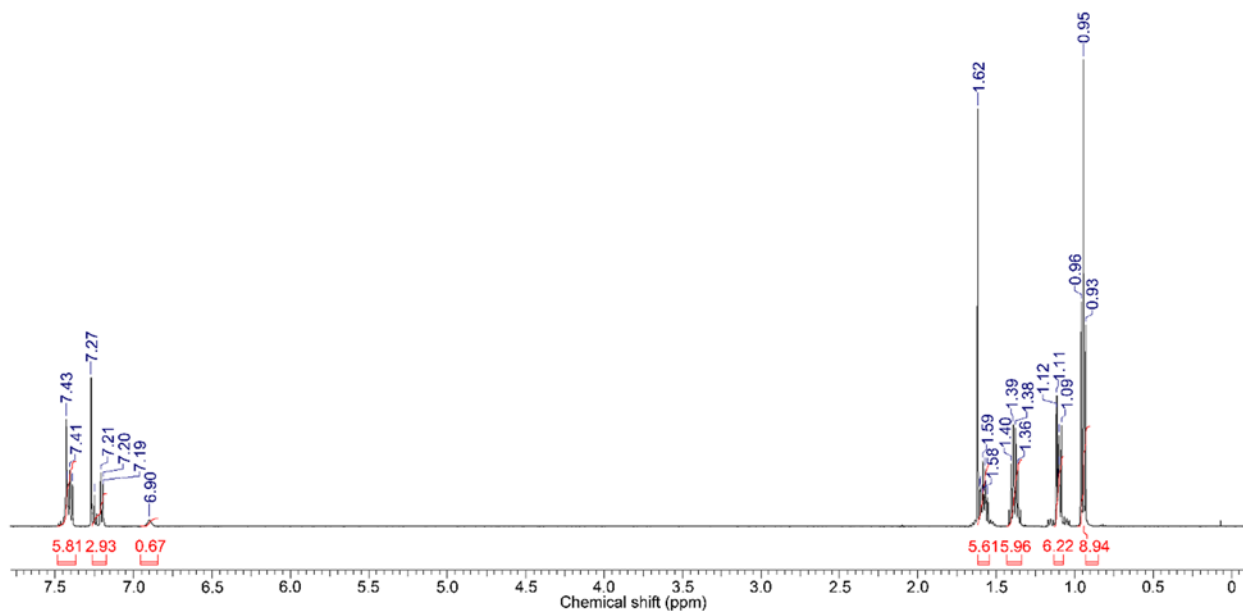

**SUPPLEMENTAL FIGURE 5.**  $^1\text{H-NMR}$  of phenyl 4-tributylstannylphenylcarbamate (2):

$\text{MP}_{(\text{hexanes})}$ : 53-55 °C. Data recorded on a Bruker AVANCE 500, operating at 500.1 MHz.

Chemical shifts are reported in parts per million relative to  $\text{Me}_4\text{Si}$  in  $\text{CDCl}_3$ .

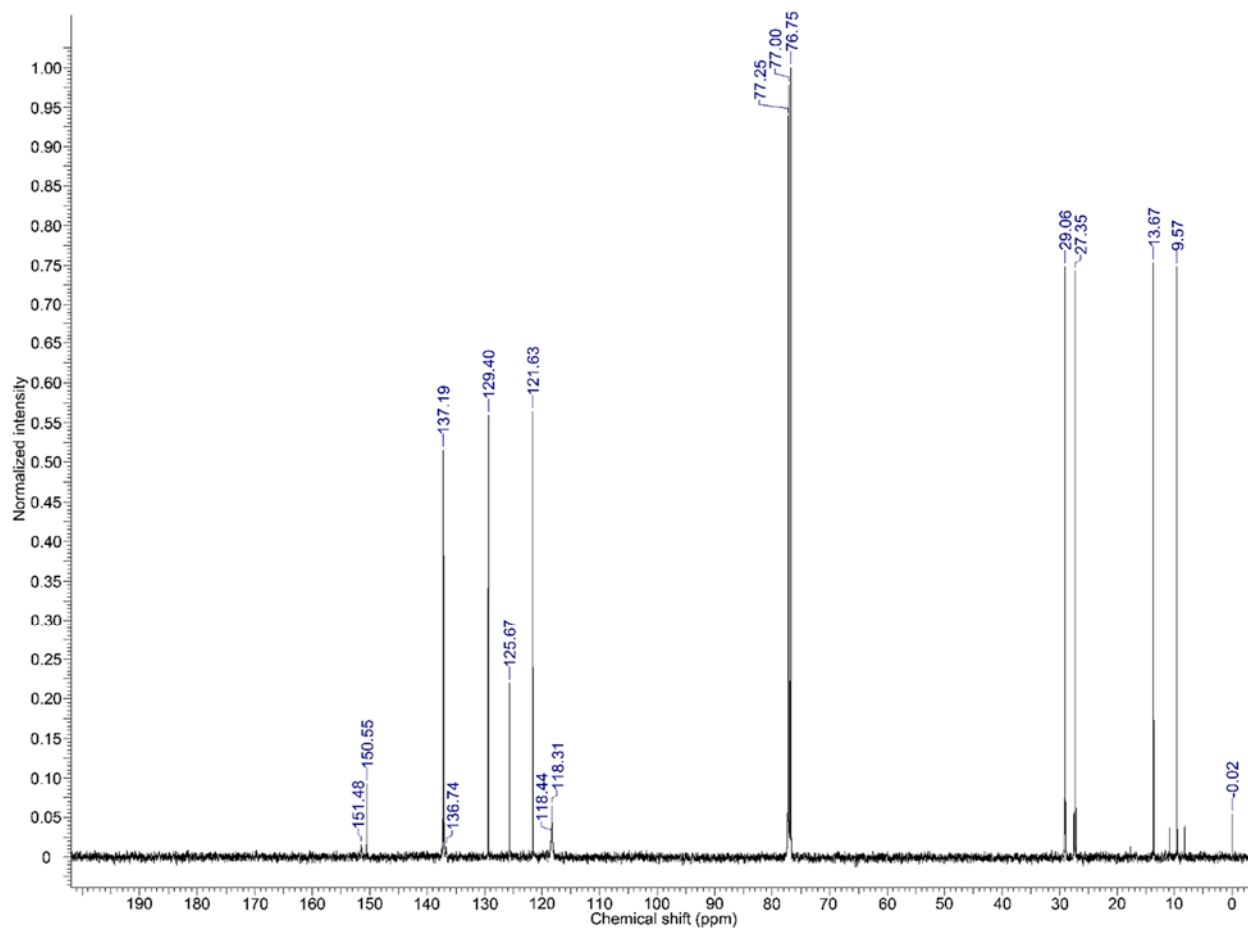

**SUPPLEMENTAL FIGURE 6.**  $^{13}\text{C}$ -NMR of phenyl 4-tributylstannylphenylcarbamate (2).

Data recorded on a Bruker AVANCE 500, operating at 125.8 MHz. Chemical shifts are reported in parts per million relative to  $\text{CDCl}_3$ .

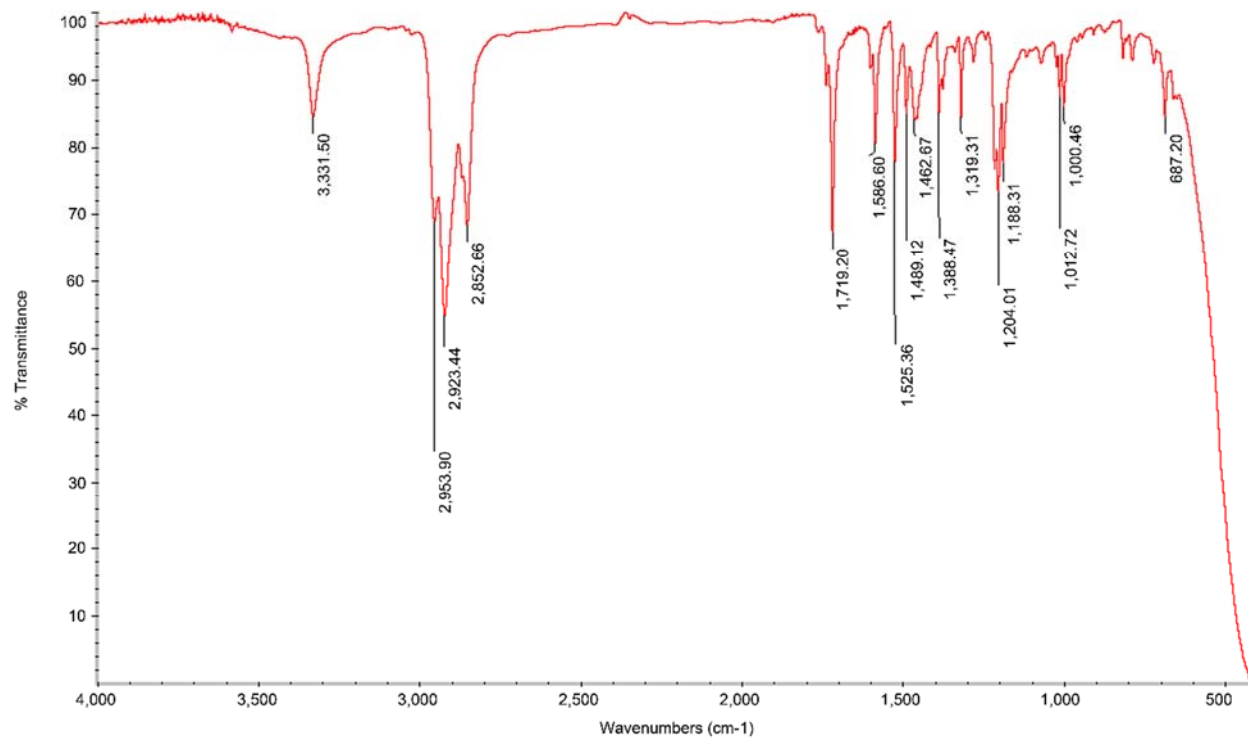

**SUPPLEMENTAL FIGURE 7.** IR spectrum of phenyl 4-tributylstannylphenylcarbamate (2).

Infrared spectra were recorded as nujol mulls on a Nicolet Avatar 330 FT-IR spectrometer

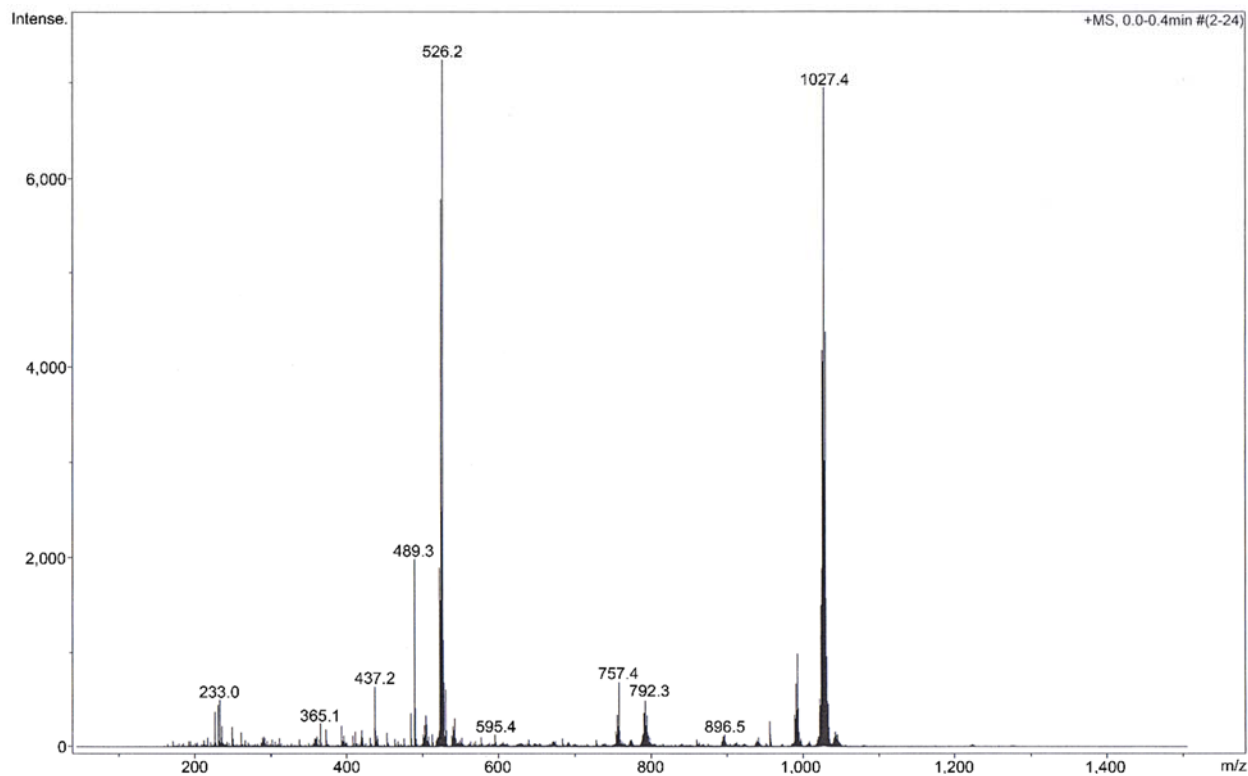

**SUPPLEMENTAL FIGURE 8.** HRMS of phenyl 4-tributylstannylphenylcarbamate (2).  $MH^+$  is indicated.



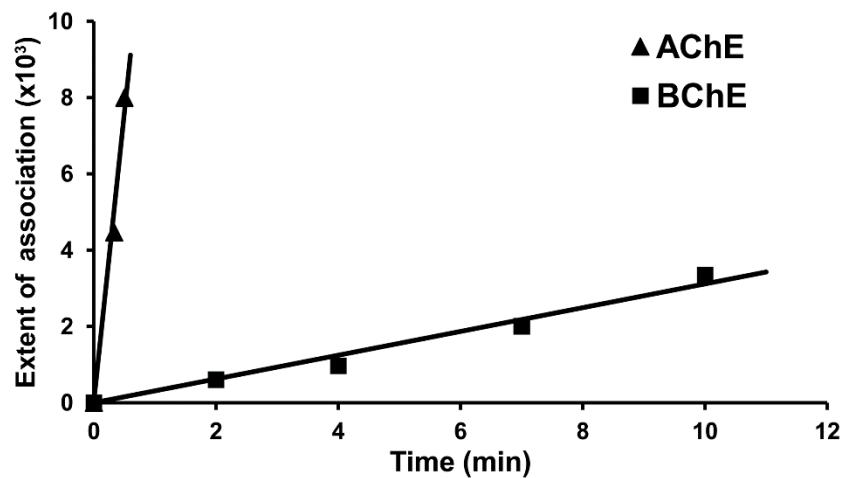

**SUPPLEMENTAL FIGURE 9.** Plots to determine second-order rate constants ( $k_a$  values) of PIP (1) with AChE and BChE. Extent of association is determined by  $\ln(e_0/e_t)/[I]$  where  $e_0$  is the enzymatic activity at time zero (without pre-incubation of enzyme and PIP) and  $e_t$  is the enzymatic activity at time (t) minutes of pre-incubation, and  $[I]$  is the PIP concentration. The slopes of these plots yield  $k_a$  values.

**SUPPLEMENTAL TABLE 1.** Demographic data of post-mortem human brain tissues. PMI:

Post mortem interval. TIF: Time in fix.

|                   | <b>Sex</b> | <b>Age (y)</b> | <b>PMI (h)</b> | <b>TIF (d)</b> |
|-------------------|------------|----------------|----------------|----------------|
| <b>Normal/AB-</b> | M          | 63             | 31             | 2.0            |
|                   | M          | 55             | 15             | 2.2            |
|                   | F          | 71             | 24             | 2.0            |
| <b>Normal/AB+</b> | F          | 86             | 52             | 3.0            |
|                   | F          | 63             | 23             | 2.0            |
| <b>AD</b>         | F          | 87             | 7              | 3.8            |
|                   | M          | 88             | 5              | 3.8            |
|                   | M          | 87             | 19             | 2.1            |
|                   | M          | 93             | 17             | 2.0            |
|                   | M          | 86             | 17             | 4.0            |
|                   | M          | 58             | 10             | 3.0            |
|                   | M          | 72             | -              | 1.9            |
|                   | M          | 98             | 10             | 2.2            |
|                   | M          | 88             | 11             | 4.8            |
|                   | F          | 68             | 17             | 2.0            |
